# Supplementary material for: The Quality, Reliability, and Accuracy of Videos Regarding Exercises and Management for Dysphagia in Pediatric Populations Uploaded on YouTube
Source: MDPI journal article supplement (doi:10.3390/children9101514), 2022-10-04
Supplement: s1 [file s1]

**Supplementary Table S1.** The link of YouTube videos regarding exercises and management for dysphagia in pediatric population

| Number | Link                                                                                                                                                                                                                | Title of Youtube Videos                                                                            |
|--------|---------------------------------------------------------------------------------------------------------------------------------------------------------------------------------------------------------------------|----------------------------------------------------------------------------------------------------|
| 1      | <a href="https://www.youtube.com/watch?v=00wP5Ivyb8M">https://www.youtube.com/watch?v=00wP5Ivyb8M</a>                                                                                                               | #e201 Preview: Developing Critical Thinking Skills in Pediatric Dysphagia - Part 1                 |
| 2      | <a href="https://www.youtube.com/watch?v=ulMngL07UF0">https://www.youtube.com/watch?v=ulMngL07UF0</a>                                                                                                               | #e202 Preview: Developing Critical Thinking Skills in Pediatric Dysphagia - Part 2                 |
| 3      | <a href="https://www.youtube.com/watch?v=xNbjU4Pg46M">https://www.youtube.com/watch?v=xNbjU4Pg46M</a>                                                                                                               | #e203 Preview: Developing Critical Thinking Skills in Pediatric Dysphagia - Part 3                 |
| 4      | <a href="https://www.youtube.com/watch?v=tzTMq8ZvB9A">https://www.youtube.com/watch?v=tzTMq8ZvB9A</a>                                                                                                               | 5 Ways to Use Throat Scope in Pediatric Feeding Therapy                                            |
| 5      | <a href="https://www.youtube.com/watch?v=QOcBCd-4l4c">https://www.youtube.com/watch?v=QOcBCd-4l4c</a>                                                                                                               | 6 Oral Motor Exercises for Babies - Oral Stimulation- Speech Development- Feeding Development      |
| 6      | <a href="https://www.youtube.com/watch?v=42Uk3SCQ1Ac">https://www.youtube.com/watch?v=42Uk3SCQ1Ac</a>                                                                                                               | Assessment and Treatment of Pediatric Feeding Disorders                                            |
| 7      | <a href="https://www.youtube.com/watch?v=IWVT0AczzAc&amp;list=PLp0zkRPXYRfor8MoG71-JZnnb6HXy_qM&amp;index=4">https://www.youtube.com/watch?v=IWVT0AczzAc&amp;list=PLp0zkRPXYRfor8MoG71-JZnnb6HXy_qM&amp;index=4</a> | Autism and Food- Autistic Toddler Feeding Routine                                                  |
| 8      | <a href="https://www.youtube.com/watch?v=bKViwlqWil4">https://www.youtube.com/watch?v=bKViwlqWil4</a>                                                                                                               | Clinical Services for the Pediatric Feeding Population                                             |
| 9      | <a href="https://www.youtube.com/watch?v=bwcdQgwG3zM">https://www.youtube.com/watch?v=bwcdQgwG3zM</a>                                                                                                               | Dr Browns Medical Webinar - The Pediatric Intensive Care Unit Dysphagia Management in the Trenches |
| 10     | <a href="https://www.youtube.com/watch?v=h3oSy5Ljupc">https://www.youtube.com/watch?v=h3oSy5Ljupc</a>                                                                                                               | Dysphagia in Children                                                                              |
| 11     | <a href="https://www.youtube.com/watch?v=wVaNlr iHLk4">https://www.youtube.com/watch?v=wVaNlr iHLk4</a>                                                                                                             | Dysphagia in Children with Down Syndrome                                                           |
| 12     | <a href="https://www.youtube.com/watch?v=agURHCdheY0">https://www.youtube.com/watch?v=agURHCdheY0</a>                                                                                                               | Dysphagia in the paediatric population                                                             |
| 13     | <a href="https://www.youtube.com/watch?v=JWYL8i2tAOA">https://www.youtube.com/watch?v=JWYL8i2tAOA</a>                                                                                                               | Dysphagia training 2.0                                                                             |
| 14     | <a href="https://www.youtube.com/watch?v=Z9ODy2P8uZY">https://www.youtube.com/watch?v=Z9ODy2P8uZY</a>                                                                                                               | Dysphagia Treatment Video 2                                                                        |
| 15     | <a href="https://www.youtube.com/watch?v=gzP8SA">https://www.youtube.com/watch?v=gzP8SA</a>                                                                                                                         | Dysphagia, GERD, Hiatal Hernia -                                                                   |

|    |                                                                                                         |                                                                                                      |
|----|---------------------------------------------------------------------------------------------------------|------------------------------------------------------------------------------------------------------|
|    | IXB7c                                                                                                   | Medical-Surgical (Med-Surg) -<br>Gastrointestinal (GI) System                                        |
| 16 | <a href="https://www.youtube.com/watch?v=nmzxyPxqXkY">https://www.youtube.com/watch?v=nmzxyPxqXkY</a>   | Evaluating Feeding and Swallowing Disorders in Infants, Children                                     |
| 17 | <a href="https://www.youtube.com/watch?v=0mGbOeuuuB8">https://www.youtube.com/watch?v=0mGbOeuuuB8</a>   | Feeding and Swallowing - Feeding Therapy Sessions - The Children's Hospital of Philadelphia (3 of 6) |
| 18 | <a href="https://www.youtube.com/watch?v=MI919Yjey34">https://www.youtube.com/watch?v=MI919Yjey34</a>   | Feeding and Swallowing Center - Introduction - The Children's Hospital of Philadelphia (1 of 6)      |
| 19 | <a href="https://www.youtube.com/watch?v=2kr8fnXj58k">https://www.youtube.com/watch?v=2kr8fnXj58k</a>   | Feeding Matters - Pediatric Feeding Disorder                                                         |
| 20 | <a href="https://www.youtube.com/watch?v=wwArSmM394g">https://www.youtube.com/watch?v=wwArSmM394g</a>   | Feeding Therapy   How To Introduce New Foods   Pediatric Occupational Therapy Tips                   |
| 21 | <a href="https://www.youtube.com/watch?v=vAoVRuGavxs">https://www.youtube.com/watch?v=vAoVRuGavxs</a>   | Feeding Therapy at Home   Our Toddler's Oral Feeding Routine                                         |
| 22 | <a href="https://www.youtube.com/watch?v=J1VVFRnWGoQ">https://www.youtube.com/watch?v=J1VVFRnWGoQ</a>   | Feeding, Eating & Swallowing for Children with Disabilities by OT Mentorship                         |
| 23 | <a href="https://www.youtube.com/watch?v=7D_zeDZTSHI">https://www.youtube.com/watch?v=7D_zeDZTSHI</a>   | Functional Education : muscular and swallowing exercises                                             |
| 24 | <a href="https://www.youtube.com/watch?v=PZwj6P9pNjw">https://www.youtube.com/watch?v=PZwj6P9pNjw</a>   | How to Improve Suck Reflex in Babies                                                                 |
| 25 | <a href="https://www.youtube.com/watch?v=x1ibGo_eFUbl">https://www.youtube.com/watch?v=x1ibGo_eFUbl</a> | How we apply feeding therapy at home                                                                 |
| 26 | <a href="https://www.youtube.com/watch?v=eWCBilQ1oGw">https://www.youtube.com/watch?v=eWCBilQ1oGw</a>   | Infant Feeding Development   OT Miri                                                                 |
| 27 | <a href="https://www.youtube.com/watch?v=n_f0N0tJUeo">https://www.youtube.com/watch?v=n_f0N0tJUeo</a>   | Infant Feeding Tips from a Pediatric Occupational Therapist                                          |
| 28 | <a href="https://www.youtube.com/watch?v=WCinLfKw3WA">https://www.youtube.com/watch?v=WCinLfKw3WA</a>   | Integrative Pediatric Feeding Therapy                                                                |
| 29 | <a href="https://www.youtube.com/watch?v=74lakvAfwuM">https://www.youtube.com/watch?v=74lakvAfwuM</a>   | Management of Pediatric Feeding and Swallowing                                                       |
| 30 | <a href="https://www.youtube.com/watch?v=GnQEm2Hnlwl">https://www.youtube.com/watch?v=GnQEm2Hnlwl</a>   | Marianjoy's Pediatric Feeding and Swallowing Evaluation Clinic                                       |
| 31 | <a href="https://www.youtube.com/watch?v=2_MvSzEE3GE">https://www.youtube.com/watch?v=2_MvSzEE3GE</a>   | MeBe Learning: All About Pediatric Feeding Disorders                                                 |
| 32 | <a href="https://www.youtube.com/watch?v=mcmp9">https://www.youtube.com/watch?v=mcmp9</a>               | Mechanism of Swallowing, Animation in                                                                |

|    |                                                                                                       |                                                                          |
|----|-------------------------------------------------------------------------------------------------------|--------------------------------------------------------------------------|
|    | s2ra2c                                                                                                | Child model                                                              |
| 33 | <a href="https://www.youtube.com/watch?v=yjNns_R7__Q">https://www.youtube.com/watch?v=yjNns_R7__Q</a> | Munroe-Meyer Pediatric Feeding Disorders Program Gi and Wyatt            |
| 34 | <a href="https://www.youtube.com/shorts/3wpD0nxsE-E">https://www.youtube.com/shorts/3wpD0nxsE-E</a>   | OPT with Pediatric Dysphagia                                             |
| 35 | <a href="https://www.youtube.com/shorts/fCaFdBQ4H-0">https://www.youtube.com/shorts/fCaFdBQ4H-0</a>   | OPT with Pediatric Dysphagia: The New Breather                           |
| 36 | <a href="https://www.youtube.com/watch?v=aveP-nkSfVk">https://www.youtube.com/watch?v=aveP-nkSfVk</a> | Oral Input   Sensory Processing & Pediatric Occupational Therapy         |
| 37 | <a href="https://www.youtube.com/watch?v=cmAKD1i2S8w">https://www.youtube.com/watch?v=cmAKD1i2S8w</a> | Oral Motor Activities for Feeding Therapy                                |
| 38 | <a href="https://www.youtube.com/watch?v=lgmSv-QuiM">https://www.youtube.com/watch?v=lgmSv-QuiM</a>   | OT Rex - Oral Motor and Feeding Development Review                       |
| 39 | <a href="https://www.youtube.com/watch?v=JdArBL13h3o">https://www.youtube.com/watch?v=JdArBL13h3o</a> | Paediatric Dysphagia - Part 1                                            |
| 40 | <a href="https://www.youtube.com/watch?v=YZM8pWY_ifc">https://www.youtube.com/watch?v=YZM8pWY_ifc</a> | Paediatric Dysphagia - Part 2                                            |
| 41 | <a href="https://www.youtube.com/watch?v=gp7muOICILs">https://www.youtube.com/watch?v=gp7muOICILs</a> | Paediatric Dysphagia - Part 3                                            |
| 42 | <a href="https://www.youtube.com/watch?v=RmRED8dbVyo">https://www.youtube.com/watch?v=RmRED8dbVyo</a> | Paediatric Dysphagia - Part 4                                            |
| 43 | <a href="https://www.youtube.com/watch?v=VxcXZiLL_WY">https://www.youtube.com/watch?v=VxcXZiLL_WY</a> | Paeds ENT   Dysphagia in the Paediatric Population   Ms. Rachel Retzler  |
| 44 | <a href="https://www.youtube.com/watch?v=nQ91hfxiZ3Y">https://www.youtube.com/watch?v=nQ91hfxiZ3Y</a> | Pediatric Center for Airway, Voice and Swallowing Disorders (PCAVS)      |
| 45 | <a href="https://www.youtube.com/watch?v=PTceX2L6A4c">https://www.youtube.com/watch?v=PTceX2L6A4c</a> | Pediatric Dysphagia                                                      |
| 46 | <a href="https://www.youtube.com/watch?v=uCrFepK2uo">https://www.youtube.com/watch?v=uCrFepK2uo</a>   | Pediatric Dysphagia 620                                                  |
| 47 | <a href="https://www.youtube.com/watch?v=h_jvCmVK5fo">https://www.youtube.com/watch?v=h_jvCmVK5fo</a> | Pediatric Dysphagia Case Study                                           |
| 48 | <a href="https://www.youtube.com/watch?v=4HHJyRX2_7M">https://www.youtube.com/watch?v=4HHJyRX2_7M</a> | Pediatric Feeding & Swallowing Module IV: Feeding & Swallowing Treatment |
| 49 | <a href="https://www.youtube.com/watch?v=tpwykR8CLqw">https://www.youtube.com/watch?v=tpwykR8CLqw</a> | Pediatric feeding and swallowing disorders. By: Prof. Samia Bassiouny    |
| 50 | <a href="https://www.youtube.com/watch?v=NamY7iosuw4">https://www.youtube.com/watch?v=NamY7iosuw4</a> | Pediatric Feeding Challenges: It's not just Chewing and Swallowing       |
| 51 | <a href="https://www.youtube.com/watch?v=u5I_HioLg7o">https://www.youtube.com/watch?v=u5I_HioLg7o</a> | Pediatric feeding disorder identified                                    |

---

|    |                                                                                                                                                                                                                       |                                                                                          |
|----|-----------------------------------------------------------------------------------------------------------------------------------------------------------------------------------------------------------------------|------------------------------------------------------------------------------------------|
| 52 | <a href="https://www.youtube.com/watch?v=JVNoHD3e2Fo">https://www.youtube.com/watch?v=JVNoHD3e2Fo</a>                                                                                                                 | Pediatric Feeding Disorder Webinar                                                       |
| 53 | <a href="https://www.youtube.com/shorts/9V-qiAspy7U">https://www.youtube.com/shorts/9V-qiAspy7U</a>                                                                                                                   | Perspectives on Pediatric Dysphagia                                                      |
| 54 | <a href="https://www.youtube.com/watch?v=V7ZPrNrA9zU">https://www.youtube.com/watch?v=V7ZPrNrA9zU</a>                                                                                                                 | Surgical Management of Pediatric Dysphagia. Dr. D. Sidell, MD                            |
| 55 | <a href="https://www.youtube.com/watch?v=TqH38XT48rY">https://www.youtube.com/watch?v=TqH38XT48rY</a>                                                                                                                 | Therapy Tip of the Week - "First, Then" Feeding Strategy                                 |
| 56 | <a href="https://www.youtube.com/watch?v=1Gl4l63wq00">https://www.youtube.com/watch?v=1Gl4l63wq00</a>                                                                                                                 | Tips for Swallowing Therapy Plateaux   What You Can Do to Improve Your Dysphagia Therapy |
| 57 | <a href="https://www.youtube.com/watch?v=GpUsVmaRvGw">https://www.youtube.com/watch?v=GpUsVmaRvGw</a>                                                                                                                 | VFSS Swallowing Study: Videofluoroscopic Swallowing Study                                |
| 58 | <a href="https://www.youtube.com/watch?v=8T9J4jvxjZs">https://www.youtube.com/watch?v=8T9J4jvxjZs</a>                                                                                                                 | What happens in a videofluoroscopy swallow study?                                        |
| 59 | <a href="https://www.youtube.com/watch?v=X2nGk2DoOt8">https://www.youtube.com/watch?v=X2nGk2DoOt8</a>                                                                                                                 | What is Feeding Therapy? Sample Session from JCFS' Integrated Pediatric Interventions    |
| 60 | <a href="https://www.youtube.com/watch?v=BRyAZtDCGM0&amp;list=PLksuAcSigtelDJ2qV1m9jcRAUiNRGkTw9&amp;index=4">https://www.youtube.com/watch?v=BRyAZtDCGM0&amp;list=PLksuAcSigtelDJ2qV1m9jcRAUiNRGkTw9&amp;index=4</a> | What the Experts Have to Say - Treatment Approaches                                      |

---
